# Supplementary material for: Green Preparation and Antibacterial Activity Evaluation of AgNPs-Blumea balsamifera Oil Nanoemulsion
Source: MDPI journal article supplement (doi:10.3390/molecules29092009), 2024-04-26
Supplement: s1 [file s1]

## Supplementary Materials

### Green preparation and antibacterial activity evaluation of AgNPs-*Blumea balsamifera* oil nanoemulsion

Chunfang Ma, Bingnan Liu, Lingfeng Du, Wei Liu, Yue Zhu, Teng Chen,  
Zuhua Wang, Hongpeng Chen and Yuxin Pang

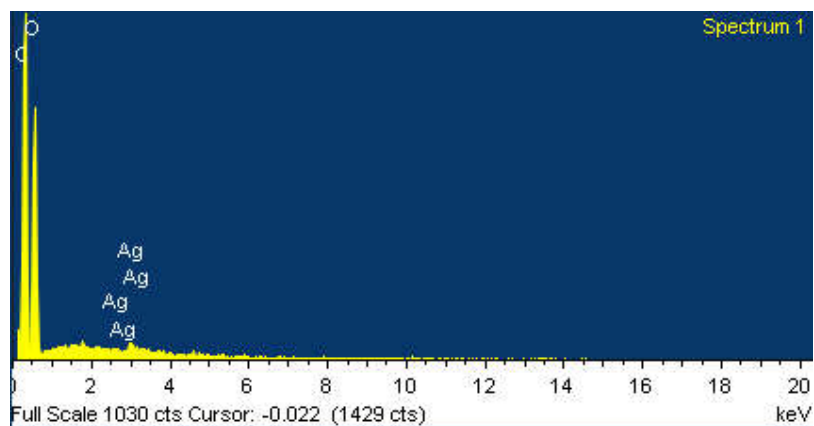

**Figure S1.** EDS elemental composition analysis of AgNPs-TS solution.

**Table S1.** Elemental composition analysis of AgNPs-TS solution.

| Element | Weight% | Atomic% |
|---------|---------|---------|
| C K     | 44.51   | 52.01   |
| O K     | 54.56   | 47.86   |
| Ag L    | 0.93    | 0.12    |
| Totals  | 100.00  |         |

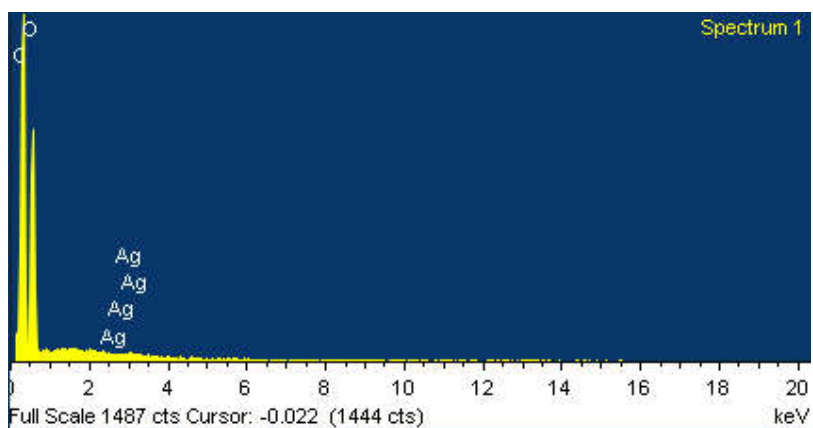

**Figure S2.** EDS elemental composition analysis of BBO-TS NE-2.

**Table S2.** Elemental composition analysis of BBO-TS NE-2.

| Element | Weight% | Atomic% |
|---------|---------|---------|
| C K     | 46.35   | 53.72   |
| O K     | 53.13   | 46.22   |
| Ag L    | 0.52    | 0.07    |
| Totals  | 100.00  |         |

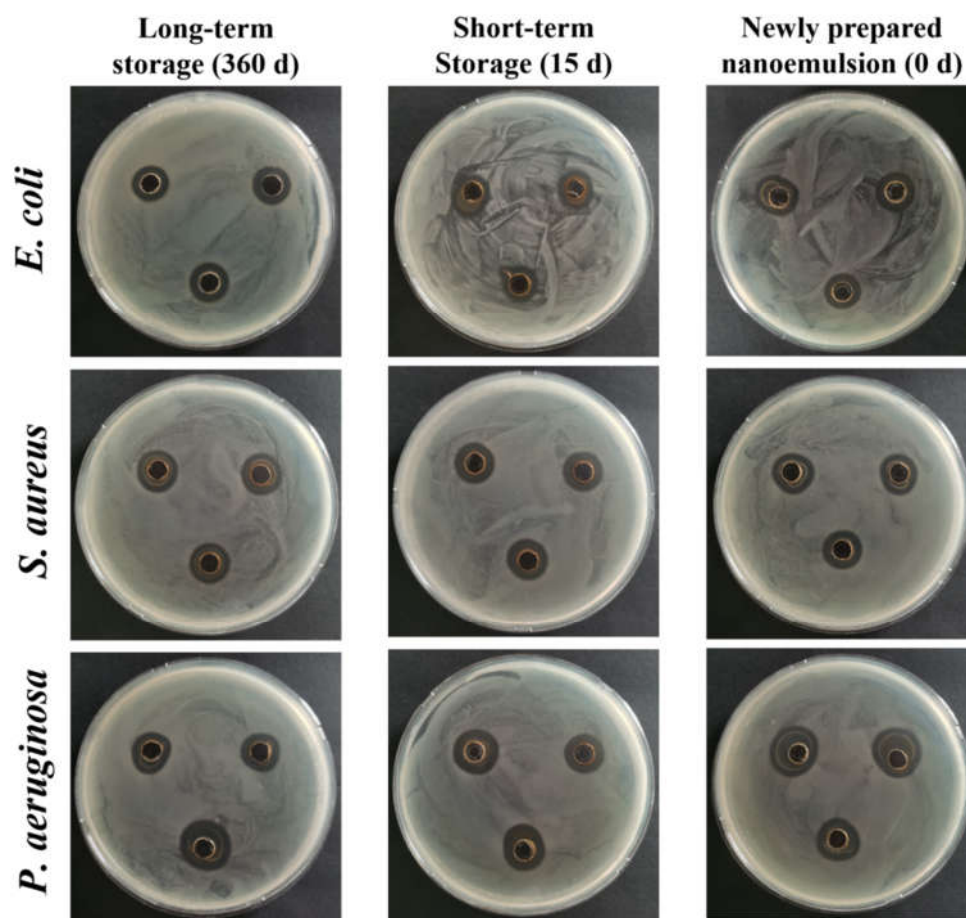

**Figure S3.** Pictures of inhibitory zones of AgNPs@BBO-TS NE on *E. coli*, *S. aureus*, and *P. aeruginosa* in different storage times (bacterial suspension 200  $\mu$ L, AgNPs@BBO-TS NE 20  $\mu$ L).

**Table S3.** BIC diameter of AgNPs@BBO-TS NE with different storage time to *E. coli*, *S. aureus*, and *P. aeruginosa* (bacterial suspension 200  $\mu$ L, AgNPs@BBO-TS NE 20  $\mu$ L).

| Culture/Group        | Bacteriostatic ring diameter (mm) |                           |                                   |
|----------------------|-----------------------------------|---------------------------|-----------------------------------|
|                      | Long-term storage (360 d)         | Short-term Storage (15 d) | Newly prepared nanoemulsion (0 d) |
| <i>E. coli</i>       | 13.3 $\pm$ 0.51                   | 13.2 $\pm$ 0.54           | 13.5 $\pm$ 0.41                   |
| <i>S. aureus</i>     | 14.3 $\pm$ 0.24                   | 14.8 $\pm$ 0.38           | 14.6 $\pm$ 0.85                   |
| <i>P. aeruginosa</i> | 15.6 $\pm$ 1.73                   | 15.4 $\pm$ 0.96           | 16.9 $\pm$ 1.59                   |
